# Supplementary material
Source: publisher figshare collection journal article supplement (https://wiley.figshare.com/articles/dataset/_/3566040)
Supplement: Supplementary file 1 [file 1]

John L. Sabo and David M. Post. 2008. Quantifying periodic, stochastic, and catastrophic environmental variation. *Ecological Monographs* 78:19–40.

| Source      | Stream name              | State | USGS station | Yr  | WA (km <sup>3</sup> ) | Alt. (m) | DLa        | DLo          |
|-------------|--------------------------|-------|--------------|-----|-----------------------|----------|------------|--------------|
| Poff & Ward | Turkey Creek             | AL    | 2427700      | 38  | 252.52                | 17.92    | 32.0209819 | -87.5583335  |
| Poff & Ward | Piney Fork               | AR    | 7073500      | 46  | 256.93                | 128.2    | 36.0806257 | -91.610974   |
| Poff & Ward | Big Piney Creek          | AR    | 7257000      | 43  | 709.66                | 148.64   | 35.5495254 | -93.1585084  |
| Poff & Ward | Cossatot River           | AR    | 7340300      | 37  | 232.06                | 235.27   | 34.3795542 | -94.235763   |
| Poff & Ward | Aravaipa Creek           | AZ    | 9473000      | 73  | 1390.82               | 714.76   | 32.8436777 | -110.619822  |
| Poff & Ward | Sycamore Creek           | AZ    | 9510200      | 44  | 424.76                | 536.24   | 33.6942105 | -111.541802  |
| Poff & Ward | Sagehen Creek            | CA    | 10343500     | 51  | 27.19                 | 1926.34  | 39.4315725 | -120.2379793 |
| Poff & Ward | Sespe Creek              | CA    | 11113000     | 93  | 650.09                | 172.21   | 34.4508281 | -118.9259322 |
| Poff & Ward | Salsipuedes Creek        | CA    | 11132500     | 63  | 121.99                | 67.06    | 34.5885957 | -120.4084938 |
| Poff & Ward | Arroyo Seco              | CA    | 11152000     | 103 | 631.96                | 103.39   | 36.2805208 | -121.3227063 |
| Poff & Ward | lark Fork Stanislaus Riv | CA    | 11292500     | 44  | 174.82                | 1678.63  | 38.3638011 | -119.8712915 |
| Poff & Ward | Big Chico Creek          | CA    | 11384000     | 56  | 187.52                | 91.44    | 39.7762726 | -121.753866  |
| Poff & Ward | Trinity River            | CA    | 11523200     | 47  | 385.91                | 773.26   | 41.1112571 | -122.7055788 |
| Poff & Ward | St. Vrain Creek          | CO    | 6724000      | 103 | 559.44                | 1613     | 40.2180409 | -105.2599887 |
| Poff & Ward | Colorado River           | CO    | 9010500      | 51  | 138.31                | 2667     | 40.3258178 | -105.8566792 |
| Poff & Ward | East River               | CO    | 9112500      | 94  | 748.51                | 2440.32  | 38.6644372 | -106.8480951 |
| Poff & Ward | Middle Oconee River      | GA    | 2217500      | 103 | 1030.82               | 169.37   | 33.9466667 | -83.4227778  |
| Poff & Ward | Satilla River            | GA    | 2226500      | 67  | 3107.99               | 20.25    | 31.2382737 | -82.3245711  |
| Poff & Ward | Winnnebago River         | IA    | 5459500      | 72  | 1362.33               | 326.01   | 43.1649618 | -93.1927034  |
| Poff & Ward | South Fork Saline River  | IL    | 3382100      | 39  | 380.73                | 114.49   | 37.6378273 | -88.6778342  |
| Poff & Ward | Lusk Creek               | IL    | 3384450      | 37  | 111.11                | 109.86   | 37.4722725 | -88.5472693  |
| Poff & Ward | Vermilion River          | IL    | 5554500      | 62  | 1499.6                | 188.81   | 40.8778112 | -88.636173   |
| Poff & Ward | Youngs Creek             | IN    | 3362000      | 62  | 277.13                | 204.28   | 39.4189396 | -86.0049889  |
| Poff & Ward | Smoky Hill River         | KS    | 6860000      | 65  | 9207.41               | 799.37   | 38.7948049 | -100.8584713 |
| Poff & Ward | Rattlesnake Creek        | KS    | 7142300      | 45  | 2030.55               | 598.46   | 37.8715937 | -98.8761373  |
| Poff & Ward | Stoner Creek             | KY    | 3252000      | 38  | 619.01                | 234.83   | 38.229243  | -84.2560426  |
| Poff & Ward | Russell Creek            | KY    | 3307000      | 65  | 486.92                | 186.22   | 37.1192281 | -85.3938524  |
| Poff & Ward | Bayou Toro               | LA    | 8025500      | 47  | 383.32                | 42.06    | 31.3071274 | -93.5157295  |
| Poff & Ward | Machias River            | ME    | 1016500      | 32  | 852.11                | 163.07   | 46.6283111 | -68.4347917  |
| Poff & Ward | Augusta Creek            | MI    | 4105700      | 40  | 100.75                | 248.41   | 42.3533734 | -85.3538894  |
| Poff & Ward | Baptism River            | MN    | 4014500      | 65  | 362.6                 | 187.04   | 47.3374172 | -91.2007189  |
| Poff & Ward | Cedar Creek              | MO    | 6919500      | 81  | 1087.8                | 225.39   | 37.8342028 | -93.8754918  |
| Poff & Ward | Skuna River              | MS    | 7283000      | 57  | 657.86                | 69.63    | 33.9736111 | -89.3477778  |
| Poff & Ward | Middle Fork Rock Creek   | MT    | 12332000     | 66  | 318.57                | 1659.36  | 46.1844928 | -113.5024736 |
| Poff & Ward | Prospect Creek           | MT    | 12390700     | 48  | 471.38                | 726.16   | 47.5860461 | -115.355153  |
| Poff & Ward | Potecasi Creek           | NC    | 2053200      | 46  | 582.75                | 1.08     | 36.3708333 | -77.0255556  |
| Poff & Ward | Hunting Creek            | NC    | 2118500      | 53  | 401.45                | 223.96   | 36.0005556 | -80.7455556  |
| Poff & Ward | Little Tennessee         | NC    | 3500000      | 60  | 362.6                 | 612.16   | 35.15      | -83.3797222  |
| Poff & Ward | Mauvais Coulee           | ND    | 5056100      | 48  | 1002.33               | 440.44   | 48.4480588 | -99.1026354  |
| Poff & Ward | Dismal River             | NE    | 6775900      | 38  | 2501.93               | 853.48   | 41.7786028 | -100.5253917 |
| Poff & Ward | Logan Creek              | NE    | 6799450      | 28  | 1893.28               | 396.53   | 42.1139444 | -96.7016611  |
| Poff & Ward | Conchas River            | NM    | 7222500      | 60  | 1354.56               | 1350.26  | 35.4028257 | -104.4435938 |
| Poff & Ward | Pecos River              | NM    | 8378500      | 85  | 489.51                | 2286.9   | 35.7083661 | -105.6825171 |
| Poff & Ward | Gallinas Creek           | NM    | 8380500      | 78  | 217.56                | 2095.5   | 35.651986  | -105.3188997 |
| Poff & Ward | Zuni River               | NM    | 9386950      | 35  | 2196.31               | 1965.96  | 35.1008658 | -108.7506376 |
| Poff & Ward | Gila River               | NM    | 9430500      | 77  | 4827.74               | 1418.78  | 33.0611789 | -108.5372751 |
| Poff & Ward | Martin Creek             | NV    | 10329500     | 83  | 453.9                 | 1432.56  | 41.5346175 | -117.4179047 |
| Poff & Ward | Owego Creek              | NY    | 1514000      | 48  | 479.15                | 249.88   | 42.1292409 | -76.2704886  |
| Poff & Ward | Auglaize River           | OH    | 4186500      | 83  | 859.88                | 217.51   | 40.9486617 | -84.2660591  |
| Poff & Ward | Conneaut Creek           | OH    | 4213000      | 82  | 453.25                | 186.02   | 41.926999  | -80.6039659  |
| Poff & Ward | Dry Creek                | OK    | 7243000      | 39  | 178.71                | 249.94   | 35.7820086 | -96.8541914  |

|             |                         |    |          |     |           |         |            |              |
|-------------|-------------------------|----|----------|-----|-----------|---------|------------|--------------|
| Poff & Ward | Im Fork of N.F. Red Riv | OK | 7303400  | 45  | 1077.44   | 522.72  | 35.01172   | -99.9037144  |
| Poff & Ward | Blue River              | OK | 7332500  | 68  | 1232.83   | 153.5   | 33.9970408 | -96.2410986  |
| Poff & Ward | Silvies River           | OR | 10393500 | 88  | 2419.05   | 1278.64 | 43.7151478 | -119.1774421 |
| Poff & Ward | Smith River             | OR | 14158790 | 44  | 41.96     | 795.53  | 44.3345666 | -122.0470074 |
| Poff & Ward | outh Fork McKenzie Riv  | OR | 14159200 | 47  | 414.4     | 521.06  | 44.047067  | -122.2178245 |
| Poff & Ward | Towanda Creek           | PA | 1532000  | 90  | 556.85    | 233.33  | 41.7070195 | -76.4846654  |
| Poff & Ward | Penns Creek             | PA | 1555000  | 75  | 779.59    | 154.45  | 40.8667492 | -77.0483088  |
| Poff & Ward | Upper Three Runs        | SC | 2197300  | 36  | 225.33    | 53.25   | 33.3848664 | -81.616498   |
| Poff & Ward | Moreau River            | SD | 6359500  | 61  | 6889.37   | 682.35  | 45.1977583 | -102.1565472 |
| Poff & Ward | Keya Paha River         | SD | 6464500  | 67  | 2771.29   | 624.77  | 43.0288928 | -99.780671   |
| Poff & Ward | Duck River              | TN | 3596000  | 64  | 277.13    | 267.68  | 35.4709099 | -86.1216556  |
| Poff & Ward | North Croton Creek      | TX | 8082180  | 21  | 650.09    | 445.75  | 33.383148  | -100.0812116 |
| Poff & Ward | Beaver Creek            | TX | 8150800  | 41  | 556.85    | 381.99  | 30.6435155 | -99.0958848  |
| Poff & Ward | San Marcos River        | TX | 8172000  | 65  | 2170.41   | 98.16   | 29.6663404 | -97.6508314  |
| Poff & Ward | Ecleto Creek            | TX | 8186500  | 42  | 619.01    | 65.54   | 28.9202542 | -97.7722221  |
| Poff & Ward | Pine Creek              | UT | 9337000  | 54  | 176.38    | 1950.72 | 37.8624875 | -111.6360113 |
| Poff & Ward | East Fork Virgin River  | UT | 9404450  | 38  | 192.18    | 1798.32 | 37.3394272 | -112.6043769 |
| Poff & Ward | Moose River             | VT | 1134500  | 57  | 194.77    | 336.5   | 44.5117231 | -71.8373143  |
| Poff & Ward | Green River             | WA | 12104500 | 48  | 249.16    | 451.1   | 47.2076095 | -121.5531519 |
| Poff & Ward | Newaukum Creek          | WA | 12108500 | 60  | 70.97     | 94.49   | 47.2756564 | -122.059559  |
| Poff & Ward | White Salmon River      | WA | 14121300 | 21  | 83.92     | 938.78  | 46.1037299 | -121.6086938 |
| Poff & Ward | Black Earth Creek       | WI | 5406500  | 50  | 118.1     | 247.79  | 43.1341598 | -89.732345   |
| Poff & Ward | Williams River          | WV | 3186500  | 75  | 331.52    | 668.57  | 38.3789992 | -80.4839737  |
| Poff & Ward | outh Fork Shoshone Riv  | WY | 6280300  | 48  | 769.23    | 1889.76 | 44.2082824 | -109.5548879 |
| Poff & Ward | East Fork River         | WY | 9203000  | 54  | 205.13    | 2346.96 | 42.6725    | -109.4216667 |
| Sabo & Post | Power Creek             | AK | 15216000 | 48  | 53.09     | 10.21   | 60.5866754 | -145.620022  |
| Sabo & Post | Kenai River             | AK | 15258000 | 57  | 1642.05   | 127.99  | 60.4921927 | -149.8099203 |
| Sabo & Post | Ship Creek              | AK | 15276000 | 58  | 231.8     | 149.35  | 61.2250062 | -149.6372008 |
| Sabo & Post | Yukon River             | AK | 15356000 | 54  | 293963.65 | 259.08  | 64.789168  | -141.2000892 |
| Sabo & Post | Kuparuk River           | AK | 15896000 | 33  | 8106.66   | 0       | 70.2813854 | -148.9627861 |
| Sabo & Post | Show Low Creek          | AZ | 9390500  | 51  | 177.67    | 2014.73 | 34.1794876 | -109.9878858 |
| Sabo & Post | San Pedro River         | AZ | 9471000  | 100 | 3196.05   | 1205.18 | 31.6259264 | -110.1745226 |
| Sabo & Post | Sacramento River        | CA | 11425500 | 75  | 55039.84  | -0.91   | 38.7743458 | -121.5982928 |
| Sabo & Post | South Fork Eel River    | CA | 11475500 | 24  | 113.7     | 421.73  | 39.7190446 | -123.6527961 |
| Sabo & Post | Elder Creek             | CA | 11475560 | 37  | 16.83     | 424     | 39.7295997 | -123.6439073 |
| Sabo & Post | South Platte River      | CO | 6707500  | 108 | 6679.58   | 1852.71 | 39.4091558 | -105.1699899 |
| Sabo & Post | Colorado River          | CO | 9163500  | 53  | 46213.16  | 1318.26 | 39.1327605 | -109.0270546 |
| Sabo & Post | Silver Springs          | FL | 2239500  | 72  | --        | 11.88   | 29.2124764 | -82.0539782  |
| Sabo & Post | Alakahi Stream          | HI | 16725000 | 40  | 2.25      | 1188.72 | 20.0711044 | -155.6708307 |
| Sabo & Post | Mississippi River       | MN | 5288500  | 73  | 49468.77  | 245.22  | 45.1266319 | -93.2968947  |
| Sabo & Post | Cartoogechaye Creek     | NC | 3500240  | 43  | 147.89    | 614.84  | 35.1588889 | -83.3941667  |
| Sabo & Post | Shooting Creek          | NC | 3546000  | 33  | 97.38     | 588.36  | 35.0248137 | -83.7073906  |
| Sabo & Post | Painted Woods Creek     | ND | 6341800  | 46  | 1105.92   | 537.95  | 47.2749942 | -100.7920791 |
| Sabo & Post | Rio Grande River        | NM | 8319000  | 77  | 41698.81  | 1559.27 | 35.4442023 | -106.4403039 |
| Sabo & Post | Hudson River            | NY | 1327750  | 104 | 7277.87   | 30.48   | 43.2695174 | -73.595949   |
| Sabo & Post | Ohio Brush Creek        | OH | 3237500  | 78  | 1002.33   | 155.63  | 38.8036838 | -83.4210227  |
| Sabo & Post | Cimarron River          | OK | 7160000  | 67  | 43750.08  | 273.25  | 35.9206022 | -97.4258744  |
| Sabo & Post | Bird Creek              | OK | 7176500  | 59  | 942.76    | 198.51  | 36.4867544 | -96.0641633  |
| Sabo & Post | Canadian River          | OK | 7231500  | 99  | 72395.35  | 208.09  | 34.9778669 | -96.2436172  |
| Sabo & Post | Tennessee River         | TN | 3568000  | 130 | 55425.75  | 189.32  | 35.0867756 | -85.2784299  |
| Sabo & Post | Helotes Creek           | TX | 8181400  | 37  | 38.86     | 309.32  | 29°34'42"  | 98°41'29"    |
| Sabo & Post | Red River               | TX | 7316000  | 68  | 79725.01  | 191.39  | 33.7278833 | -97.160013   |

|             |                |             |          |    |           |        |            |              |
|-------------|----------------|-------------|----------|----|-----------|--------|------------|--------------|
| Sabo & Post | Mount Run      | VA          | 1665000  | 50 | 41.18     | 118.71 | 38.4806813 | -78.0524983  |
| Sabo & Post | Columbia River | WA          | 12399500 | 66 | 154622.29 | 365.76 | 49.0007497 | -117.6294206 |
| Sabo & Post | Yukon River    | Yukon Terr. | 15305350 | 44 | 81843.62  | 0      | 62.0955606 | -136.2736643 |

| CDC   | CV     | C    | M    | P    | $v_1$   | $v_2$ | $v_3$ | $v_4$ |
|-------|--------|------|------|------|---------|-------|-------|-------|
| NAD83 | 43.7   | 0.16 | 0.23 | 0.39 | 43.696  | 0.16  | 0.231 | 0.391 |
| NAD83 | 39.39  | 0.18 | 0.2  | 0.38 | 39.386  | 0.183 | 0.196 | 0.379 |
| NAD83 | --     | --   | --   | --   | NaN     | NaN   | NaN   | NaN   |
| NAD83 | 29.23  | 0.32 | 0.17 | 0.49 | 29.233  | 0.325 | 0.168 | 0.493 |
| NAD83 | 23.9   | 0.4  | 0.1  | 0.5  | 23.897  | 0.402 | 0.095 | 0.497 |
| NAD83 | 141.14 | 0.22 | 0.16 | 0.38 | 141.137 | 0.216 | 0.161 | 0.377 |
| NAD83 | 47.61  | 0.21 | 0.22 | 0.43 | 47.605  | 0.209 | 0.217 | 0.426 |
| NAD83 | --     | --   | --   | --   | NaN     | NaN   | NaN   | NaN   |
| NAD83 | 97.09  | 0.03 | 0.16 | 0.19 | 97.094  | 0.029 | 0.161 | 0.189 |
| NAD83 | 59.95  | 0.06 | 0.26 | 0.32 | 59.952  | 0.059 | 0.262 | 0.321 |
| NAD83 | 26.27  | 0.38 | 0.19 | 0.57 | 26.27   | 0.383 | 0.191 | 0.575 |
| NAD83 | 26.95  | 0.41 | 0.19 | 0.6  | 26.952  | 0.412 | 0.192 | 0.604 |
| NAD83 | 24.97  | 0.39 | 0.26 | 0.65 | 24.967  | 0.385 | 0.26  | 0.645 |
| NAD83 | 29.9   | 0.32 | 0.35 | 0.67 | 29.899  | 0.317 | 0.351 | 0.668 |
| NAD83 | 36.43  | 0.27 | 0.35 | 0.62 | 36.429  | 0.273 | 0.349 | 0.622 |
| NAD83 | 20.84  | 0.54 | 0.26 | 0.8  | 20.84   | 0.542 | 0.257 | 0.798 |
| NAD83 | 15.76  | 0.54 | 0.09 | 0.63 | 15.758  | 0.542 | 0.089 | 0.631 |
| NAD83 | 32.83  | 0.31 | 0.12 | 0.43 | 32.834  | 0.305 | 0.12  | 0.425 |
| NAD83 | 24.72  | 0.35 | 0.11 | 0.46 | 24.722  | 0.347 | 0.114 | 0.461 |
| NAD83 | 38.32  | 0.23 | 0.2  | 0.43 | 38.325  | 0.229 | 0.203 | 0.431 |
| NAD83 | 73.95  | 0.01 | 0.26 | 0.27 | 73.949  | 0.008 | 0.259 | 0.267 |
| NAD83 | 40.69  | 0.17 | 0.17 | 0.34 | 40.693  | 0.173 | 0.171 | 0.344 |
| NAD83 | 34.53  | 0.22 | 0.16 | 0.38 | 34.526  | 0.219 | 0.164 | 0.383 |
| NAD83 | 159.17 | 0.23 | 0.15 | 0.38 | 159.175 | 0.226 | 0.149 | 0.375 |
| NAD83 | 60.79  | 0.13 | 0.11 | 0.24 | 60.787  | 0.13  | 0.114 | 0.243 |
| NAD83 | 40.46  | 0.16 | 0.18 | 0.34 | 40.464  | 0.157 | 0.183 | 0.34  |
| NAD83 | --     | --   | --   | --   | NaN     | NaN   | NaN   | NaN   |
| NAD83 | --     | --   | --   | --   | NaN     | NaN   | NaN   | NaN   |
| NAD83 | 20.23  | 0.46 | 0.15 | 0.61 | 20.231  | 0.458 | 0.152 | 0.61  |
| NAD83 | 9.68   | 0.67 | 0.06 | 0.74 | 9.678   | 0.674 | 0.061 | 0.735 |
| NAD83 | 31.29  | 0.28 | 0.19 | 0.47 | 31.291  | 0.283 | 0.186 | 0.469 |
| NAD83 | --     | --   | --   | --   | NaN     | NaN   | NaN   | NaN   |
| NAD83 | --     | --   | --   | --   | NaN     | NaN   | NaN   | NaN   |
| NAD83 | 20.57  | 0.56 | 0.26 | 0.82 | 20.57   | 0.561 | 0.256 | 0.816 |
| NAD83 | 21.41  | 0.45 | 0.22 | 0.67 | 21.412  | 0.454 | 0.22  | 0.673 |
| NAD83 | 42.72  | 0.18 | 0.17 | 0.35 | 42.719  | 0.181 | 0.171 | 0.353 |
| NAD83 | 15.36  | 0.57 | 0.07 | 0.63 | 15.362  | 0.566 | 0.067 | 0.633 |
| NAD83 | 11.98  | 0.64 | 0.08 | 0.71 | 11.978  | 0.638 | 0.076 | 0.714 |
| NAD83 | --     | --   | --   | --   | NaN     | NaN   | NaN   | NaN   |
| NAD83 | 1.5    | 0.75 | 0.01 | 0.76 | 1.497   | 0.751 | 0.009 | 0.759 |
| NAD83 | 19.12  | 0.52 | 0.06 | 0.58 | 19.119  | 0.521 | 0.061 | 0.583 |
| NAD83 | 196.08 | 0.28 | 0.14 | 0.42 | 196.076 | 0.279 | 0.141 | 0.42  |
| NAD83 | 21.67  | 0.45 | 0.23 | 0.68 | 21.675  | 0.453 | 0.232 | 0.685 |
| NAD83 | 33.73  | 0.23 | 0.15 | 0.38 | 33.727  | 0.232 | 0.152 | 0.384 |
| NAD83 | 133.18 | 0.14 | 0.23 | 0.37 | 133.177 | 0.136 | 0.232 | 0.368 |
| NAD83 | 18.58  | 0.47 | 0.09 | 0.56 | 18.58   | 0.47  | 0.095 | 0.565 |
| NAD83 | 36.88  | 0.3  | 0.28 | 0.58 | 36.882  | 0.296 | 0.282 | 0.578 |
| NAD83 | 28.07  | 0.34 | 0.19 | 0.54 | 28.068  | 0.343 | 0.193 | 0.536 |
| NAD83 | 34.4   | 0.24 | 0.14 | 0.39 | 34.402  | 0.244 | 0.142 | 0.385 |
| NAD83 | 31.74  | 0.27 | 0.18 | 0.44 | 31.741  | 0.265 | 0.176 | 0.441 |
| NAD83 | 79.85  | 0.03 | 0.17 | 0.2  | 79.845  | 0.028 | 0.168 | 0.195 |

|       |        |        |        |        |         |       |       |       |
|-------|--------|--------|--------|--------|---------|-------|-------|-------|
| NAD83 | --     | --     | --     | --     | NaN     | NaN   | NaN   | NaN   |
| NAD83 | 25.21  | 0.36   | 0.13   | 0.49   | 25.21   | 0.363 | 0.131 | 0.494 |
| NAD83 | 33.37  | 0.23   | 0.23   | 0.47   | 33.366  | 0.234 | 0.231 | 0.465 |
| NAD83 | 37.2   | 0.25   | 0.29   | 0.54   | 37.199  | 0.25  | 0.289 | 0.539 |
| NAD83 | --     | --     | --     | --     | NaN     | NaN   | NaN   | NaN   |
| NAD83 | 29.26  | 0.3    | 0.18   | 0.47   | 29.264  | 0.299 | 0.176 | 0.474 |
| NAD83 | 16.83  | 0.52   | 0.13   | 0.65   | 16.827  | 0.515 | 0.133 | 0.649 |
| NAD83 | 5.41   | 0.7    | 0.02   | 0.72   | 5.414   | 0.701 | 0.016 | 0.717 |
| NAD83 | 56     | 0.07   | 0.18   | 0.25   | 55.997  | 0.072 | 0.179 | 0.251 |
| NAD83 | 20.1   | 0.42   | 0.13   | 0.55   | 20.099  | 0.421 | 0.128 | 0.549 |
| NAD83 | --     | --     | --     | --     | NaN     | NaN   | NaN   | NaN   |
| NAD83 | 107.26 | 0.05   | 0.12   | 0.17   | 107.263 | 0.049 | 0.12  | 0.17  |
| NAD83 | 69.65  | 0.03   | 0.18   | 0.21   | 69.65   | 0.028 | 0.18  | 0.207 |
| NAD83 | 15.8   | 0.58   | 0.04   | 0.62   | 15.796  | 0.579 | 0.042 | 0.62  |
| NAD83 | --     | --     | --     | --     | NaN     | NaN   | NaN   | NaN   |
| NAD83 | 42.06  | 0.15   | 0.15   | 0.3    | 42.061  | 0.151 | 0.146 | 0.298 |
| NAD83 | 20.79  | 0.47   | 0.15   | 0.62   | 20.789  | 0.474 | 0.148 | 0.622 |
| NAD83 | 22.91  | 0.4    | 0.15   | 0.55   | 22.913  | 0.402 | 0.152 | 0.554 |
| NAD83 | --     | --     | --     | --     | NaN     | NaN   | NaN   | NaN   |
| NAD83 | 20.66  | 0.46   | 0.2    | 0.66   | 20.661  | 0.456 | 0.202 | 0.658 |
| NAD83 | 8.96   | 0.68   | 0.1    | 0.78   | 8.963   | 0.684 | 0.098 | 0.782 |
| NAD83 | 10.09  | 0.66   | 0.03   | 0.69   | 10.085  | 0.656 | 0.032 | 0.688 |
| NAD83 | 28.38  | 0.33   | 0.15   | 0.48   | 28.376  | 0.333 | 0.147 | 0.48  |
| NAD83 | 20.01  | 0.57   | 0.27   | 0.83   | 20.007  | 0.566 | 0.269 | 0.835 |
| NAD83 | 41.03  | 0.22   | 0.31   | 0.53   | 41.034  | 0.221 | 0.311 | 0.532 |
| NAD83 | 20.87  | 0.44   | 0.23   | 0.68   | 20.875  | 0.443 | 0.233 | 0.676 |
| NAD83 | 13.1   | 0.68   | 0.23   | 0.91   | 13.1    | 0.683 | 0.226 | 0.909 |
| NAD83 | 25.36  | 0.38   | 0.31   | 0.69   | 25.36   | 0.376 | 0.314 | 0.691 |
| NAD83 | 8.71   | 0.7    | 0.27   | 0.97   | 8.709   | 0.699 | 0.267 | 0.966 |
| NAD83 | 104.31 | 0.32   | 0.44   | 0.76   | 104.309 | 0.317 | 0.439 | 0.755 |
| NAD83 | 60.51  | 0.1    | 0.16   | 0.26   | 60.513  | 0.099 | 0.156 | 0.255 |
| NAD83 | 44.1   | 0.21   | 0.23   | 0.44   | 44.1    | 0.208 | 0.229 | 0.437 |
| NAD83 | 6.33   | 0.7    | 0.05   | 0.76   | 6.333   | 0.704 | 0.053 | 0.757 |
| NAD83 | 48.5   | 0.14   | 0.35   | 0.49   | 48.495  | 0.142 | 0.352 | 0.494 |
| NAD83 | 62.79  | 0.09   | 0.33   | 0.42   | 62.786  | 0.095 | 0.327 | 0.422 |
| NAD83 | 13.31  | 0.6    | 0.23   | 0.83   | 13.312  | 0.596 | 0.23  | 0.826 |
| NAD83 | 7.81   | 0.68   | 0.05   | 0.73   | 7.813   | 0.678 | 0.053 | 0.73  |
| NAD83 | 3.37   | 0.71   | 0      | 0.72   | 3.365   | 0.714 | 0.003 | 0.717 |
| NAD83 | 61.58  | 0.07   | 0.12   | 0.19   | 61.58   | 0.071 | 0.122 | 0.194 |
| NAD83 | 7.57   | 0.71   | 0.06   | 0.76   | 7.565   | 0.706 | 0.058 | 0.764 |
| NAD83 | 15.38  | 0.56   | 0.1    | 0.66   | 15.379  | 0.56  | 0.105 | 0.665 |
| NAD83 | --     | --     | --     | --     | NaN     | NaN   | NaN   | NaN   |
| NAD83 | 37.19  | 0.16   | 0.12   | 0.28   | 37.187  | 0.163 | 0.118 | 0.281 |
| NAD83 | 9.82   | 0.64   | 0.07   | 0.72   | 9.825   | 0.645 | 0.073 | 0.718 |
| NAD83 | 6.65   | 0.7    | 0.07   | 0.77   | 6.652   | 0.698 | 0.067 | 0.765 |
| NAD83 | 43.48  | 0.15   | 0.21   | 0.36   | 43.485  | 0.147 | 0.211 | 0.358 |
| NAD83 | 18.17  | 0.46   | 0.08   | 0.54   | 18.174  | 0.462 | 0.075 | 0.538 |
| NAD83 | 36.48  | 0.19   | 0.12   | 0.3    | 36.479  | 0.186 | 0.116 | 0.302 |
| NAD83 | 22.69  | 0.37   | 0.14   | 0.5    | 22.689  | 0.366 | 0.135 | 0.501 |
| NAD83 | 6.02   | 0.7    | 0.02   | 0.72   | 6.021   | 0.7   | 0.024 | 0.723 |
| NAD27 | 220.68 | 0.6504 | 0.0722 | 0.7226 | 236.107 | 0.65  | 0.072 | 0.723 |
| NAD83 | 17.3   | 0.48   | 0.06   | 0.54   | 17.303  | 0.476 | 0.064 | 0.539 |

|       |      |      |      |      |       |       |       |       |
|-------|------|------|------|------|-------|-------|-------|-------|
| NAD83 | --   | --   | --   | --   | NaN   | NaN   | NaN   | NaN   |
| NAD83 | 2.8  | 0.71 | 0.06 | 0.77 | 2.798 | 0.712 | 0.057 | 0.769 |
| NAD83 | 6.67 | 0.7  | 0.25 | 0.95 | 6.666 | 0.699 | 0.255 | 0.954 |

| $V_5$ | $a_1$ | $a_2$ | $a_3$ | $a_4$ | $a_5$ | $A_{rms}$ | $N_{rms}$ | SNR    |
|-------|-------|-------|-------|-------|-------|-----------|-----------|--------|
| 1     | 2     | --    | --    | --    | 0     | 0.308     | 0.007     | 75.464 |
| 1     | --    | --    | --    | --    | 0     | 0.35      | 0.007     | 76.951 |
| --    | --    | --    | --    | --    | --    | --        | --        | --     |
| 1     | --    | --    | --    | --    | 0     | 0.235     | 0.006     | 74.532 |
| 1     | 2     | --    | --    | --    | 0     | 0.097     | 0.005     | 59.136 |
| 1     | 2     | --    | --    | --    | 1     | 0.707     | 0.025     | 66.63  |
| 1     | 2     | --    | --    | --    | 0     | 0.329     | 0.008     | 75.557 |
| --    | --    | --    | --    | --    | --    | --        | --        | --     |
| 1     | --    | --    | --    | --    | 1     | 0.746     | 0.019     | 73.621 |
| 1     | --    | --    | --    | --    | 1     | 0.651     | 0.008     | 87.53  |
| 1     | 2     | 3     | --    | --    | 0     | 0.166     | 0.004     | 75.65  |
| 1     | --    | --    | --    | --    | 0     | 0.27      | 0.005     | 81.701 |
| 1     | --    | --    | --    | --    | 0     | 0.287     | 0.003     | 89.794 |
| 1     | 2     | --    | --    | --    | 0     | 0.287     | 0.003     | 92.446 |
| 1     | 2     | 3     | 4     | --    | 0     | 0.238     | 0.003     | 84.724 |
| 1     | 2     | 3     | 4     | --    | 0     | 0.135     | 0.002     | 84.386 |
| 1     | --    | --    | --    | --    | 0     | 0.116     | 0.003     | 72.734 |
| 1     | 2     | --    | --    | --    | 0     | 0.172     | 0.006     | 67.121 |
| 1     | 2     | 3     | --    | --    | 0     | 0.114     | 0.005     | 61.75  |
| 1     | --    | --    | --    | --    | 0     | 0.344     | 0.007     | 77.076 |
| 1     | --    | --    | --    | --    | 1     | 0.739     | 0.013     | 81.354 |
| 1     | 2     | --    | --    | --    | 0     | 0.243     | 0.008     | 68.483 |
| 1     | --    | --    | --    | --    | 0     | 0.287     | 0.007     | 73.991 |
| --    | --    | --    | --    | --    | --    | --        | 0.019     | --     |
| 1     | --    | --    | --    | --    | 0     | 0.233     | 0.011     | 61.421 |
| 1     | --    | --    | --    | --    | 0     | 0.356     | 0.008     | 75.855 |
| --    | --    | --    | --    | --    | --    | --        | --        | --     |
| --    | --    | --    | --    | --    | --    | --        | --        | --     |
| 2     | 1     | 3     | 4     | --    | 0     | 0.096     | 0.004     | 66.171 |
| 1     | 2     | --    | --    | --    | 0     | 0.044     | 0.002     | 62.484 |
| 2     | 1     | --    | --    | --    | 0     | 0.199     | 0.006     | 70.887 |
| --    | --    | --    | --    | --    | --    | --        | --        | --     |
| --    | --    | --    | --    | --    | --    | --        | --        | --     |
| 1     | 2     | 3     | 4     | --    | 0     | 0.131     | 0.002     | 83.322 |
| 1     | 2     | --    | --    | --    | 0     | 0.167     | 0.003     | 80.768 |
| 1     | 2     | --    | --    | --    | 0     | 0.243     | 0.008     | 68.771 |
| 1     | --    | --    | --    | --    | 0     | 0.092     | 0.003     | 67.816 |
| 1     | --    | --    | --    | --    | 0     | 0.091     | 0.002     | 73.258 |
| --    | --    | --    | --    | --    | --    | --        | --        | --     |
| --    | --    | --    | --    | --    | --    | --        | 0         | --     |
| 1     | --    | --    | --    | --    | 0     | 0.089     | 0.004     | 61.436 |
| 1     | 2     | --    | --    | --    | 1     | 0.616     | 0.032     | 58.981 |
| 1     | 2     | 3     | --    | --    | 0     | 0.152     | 0.003     | 78.448 |
| 1     | --    | --    | --    | --    | 0     | 0.246     | 0.008     | 68.455 |
| 1     | 2     | --    | --    | --    | 1     | 0.718     | 0.024     | 67.631 |
| 2     | --    | --    | --    | --    | 0     | 0.074     | 0.004     | 56.973 |
| 1     | 2     | 4     | --    | --    | 0     | 0.248     | 0.005     | 76.753 |
| 1     | 2     | --    | --    | --    | 0     | 0.192     | 0.005     | 73.745 |
| 1     | --    | --    | --    | --    | 0     | 0.237     | 0.007     | 70.652 |
| 1     | 2     | --    | --    | --    | 0     | 0.203     | 0.006     | 70.528 |
| 1     | 2     | --    | --    | --    | 1     | 0.454     | 0.019     | 63.699 |



|    |    |    |    |    |    |       |       |        |
|----|----|----|----|----|----|-------|-------|--------|
| -- | -- | -- | -- | -- | -- | --    | --    | --     |
| 1  | 2  | -- | -- | -- | 0  | 0.134 | 0.005 | 64.396 |
| 1  | 2  | -- | -- | -- | 0  | 0.287 | 0.005 | 80.767 |
| 1  | 2  | -- | -- | -- | 0  | 0.305 | 0.005 | 83.115 |
| -- | -- | -- | -- | -- | -- | --    | --    | --     |
| 1  | 2  | -- | -- | -- | 0  | 0.196 | 0.005 | 72.576 |
| 1  | -- | -- | -- | -- | 0  | 0.142 | 0.003 | 75.933 |
| 1  | -- | -- | -- | -- | 0  | 0.02  | 0.001 | 55.846 |
| 1  | -- | -- | -- | -- | 0  | 0.407 | 0.013 | 68.99  |
| 1  | 2  | -- | -- | -- | 0  | 0.131 | 0.004 | 69.464 |
| -- | -- | -- | -- | -- | -- | --    | --    | --     |
| -- | -- | -- | -- | -- | -- | --    | 0.025 | --     |
| 1  | -- | -- | -- | -- | 0  | 0.419 | 0.016 | 65.861 |
| -- | -- | -- | -- | -- | -- | --    | 0.004 | --     |
| -- | -- | -- | -- | -- | -- | --    | --    | --     |
| 1  | 2  | -- | -- | -- | 0  | 0.221 | 0.01  | 62.464 |
| 1  | 2  | -- | -- | -- | 0  | 0.12  | 0.003 | 71.208 |
| 2  | 1  | 3  | -- | -- | 0  | 0.113 | 0.004 | 64.756 |
| -- | -- | -- | -- | -- | -- | --    | --    | --     |
| 1  | 2  | 3  | -- | -- | 0  | 0.123 | 0.003 | 73.218 |
| 1  | 2  | -- | -- | -- | 0  | 0.056 | 0.002 | 70.572 |
| -- | -- | -- | -- | -- | -- | --    | 0.002 | --     |
| 1  | -- | -- | -- | -- | 0  | 0.233 | 0.005 | 75.352 |
| 1  | 2  | 3  | -- | -- | 0  | 0.151 | 0.002 | 89.412 |
| 1  | 2  | 3  | -- | -- | 0  | 0.309 | 0.004 | 86.023 |
| 1  | 3  | -- | -- | -- | 0  | 0.178 | 0.003 | 83.51  |
| 1  | 2  | 3  | -- | -- | 0  | 0.1   | 0.001 | 88.491 |
| 1  | 2  | 3  | 4  | -- | 0  | 0.163 | 0.002 | 84.079 |
| 1  | 2  | 3  | 4  | -- | 0  | 0.059 | 0.001 | 91.363 |
| 1  | 3  | 4  | 2  | 6  | 1  | 0.619 | 0.009 | 84.921 |
| 2  | -- | -- | -- | -- | 0  | 0.178 | 0.013 | 52.785 |
| 2  | 3  | -- | -- | -- | 0  | 0.172 | 0.008 | 60.192 |
| 1  | 2  | -- | -- | -- | 0  | 0.033 | 0.001 | 66.039 |
| 1  | -- | -- | -- | -- | 1  | 0.563 | 0.007 | 88.932 |
| 1  | -- | -- | -- | -- | 1  | 0.704 | 0.009 | 86.878 |
| 1  | 2  | -- | -- | -- | 0  | 0.112 | 0.002 | 83.184 |
| 1  | 2  | 3  | -- | -- | 0  | 0.042 | 0.001 | 69.729 |
| -- | -- | -- | -- | -- | -- | --    | 0.001 | --     |
| 1  | -- | -- | -- | -- | 0  | 0.173 | 0.014 | 49.585 |
| 1  | 2  | -- | -- | -- | 0  | 0.042 | 0.002 | 66.38  |
| 1  | -- | -- | -- | -- | 0  | 0.126 | 0.003 | 75.547 |
| -- | -- | -- | -- | -- | -- | --    | --    | --     |
| -- | -- | -- | -- | -- | -- | --    | 0.014 | --     |
| 1  | -- | -- | -- | -- | 0  | 0.089 | 0.002 | 77.323 |
| 1  | 2  | -- | -- | -- | 0  | 0.038 | 0.001 | 67.426 |
| 1  | -- | -- | -- | -- | 0  | 0.408 | 0.008 | 79.841 |
| 1  | -- | -- | -- | -- | 0  | 0.092 | 0.004 | 60.4   |
| 1  | -- | -- | -- | -- | 0  | 0.251 | 0.01  | 64.048 |
| 1  | 2  | -- | -- | -- | 0  | 0.133 | 0.005 | 65.199 |
| 1  | 2  | -- | -- | -- | 0  | 0.021 | 0.001 | 55.369 |
| -- | -- | -- | -- | -- | -- | --    | 0.052 | --     |
| 1  | -- | -- | -- | -- | 0  | 0.079 | 0.004 | 59.624 |

|    |    |    |    |    |    |       |       |        |
|----|----|----|----|----|----|-------|-------|--------|
| -- | -- | -- | -- | -- | -- | --    | --    | --     |
| 2  | 1  | 3  | -- | -- | 0  | 0.014 | 0.001 | 64.967 |
| 1  | 3  | 2  | -- | -- | 0  | 0.052 | 0     | 95.47  |

| $\theta_d$ | $\theta_a$ | $\sigma_{\text{lf}}$ | $\sigma_{\text{rf}}$ | $Q_2$ | $Q_{10}$ | $L_2$ | $L_{10}$ | $\overline{ZF}$ |
|------------|------------|----------------------|----------------------|-------|----------|-------|----------|-----------------|
| 1.453      | -0.459     | 0.476                | 0.237                | 1.885 | 2.093    | 0.346 | 0.144    | 0               |
| 1.353      | 0          | 0.688                | 0.274                | 1.845 | 2.064    | 0.366 | 0.119    | 0.05            |
| --         | --         | --                   | --                   | --    | --       | --    | --       | --              |
| 1.369      | 0          | 0.471                | 0.186                | 1.601 | 1.716    | 0.594 | 0.524    | 0               |
| 1.24       | 0          | 0.589                | 0.228                | 1.676 | 2.139    | 0.598 | 0.291    | 0               |
| 1.495      | 0          | 2.491                | 0.938                | 4.313 | 5.969    | 0.068 | -0.018   | 57.1            |
| 1.753      | 0          | 0.772                | 0.331                | 2.047 | 2.51     | 0.566 | 0.414    | 0               |
| --         | --         | --                   | --                   | --    | --       | --    | --       | --              |
| 1.284      | 0          | 2.223                | 0.652                | 3.323 | 5.068    | 0.265 | -0.029   | 0               |
| 1.65       | 0          | 0.631                | 0.314                | 2.168 | 2.483    | 0.39  | 0.079    | 36.55           |
| 1.807      | 0          | 0.262                | 0.159                | 1.522 | 1.65     | 0.722 | 0.636    | 0               |
| 1.707      | 0          | 0.433                | 0.189                | 1.678 | 1.86     | 0.748 | 0.692    | 0               |
| 1.821      | 0          | 0.299                | 0.131                | 1.468 | 1.584    | 0.669 | 0.613    | 0               |
| 1.691      | -0.404     | 0.166                | 0.178                | 1.654 | 1.795    | 0.481 | 0.239    | 0               |
| 1.994      | 0          | 0.216                | 0.195                | 1.867 | 2.022    | 0.592 | 0.497    | 0               |
| 2.076      | 0          | 0.107                | 0.112                | 1.481 | 1.566    | 0.772 | 0.706    | 0               |
| 1.617      | 0          | 0.232                | 0.164                | 1.302 | 1.396    | 0.821 | 0.63     | 0               |
| 2.233      | -0.225     | 0.305                | 0.23                 | 1.526 | 1.664    | 0.562 | 0.429    | 0               |
| 1.982      | 0          | 0.296                | 0.271                | 1.547 | 1.7      | 0.653 | 0.435    | 0               |
| 1.614      | 0          | 0.517                | 0.242                | 1.909 | 2.055    | 0.446 | 0.298    | 0               |
| 1.347      | 0          | 0.943                | 0.43                 | 2.424 | 2.647    | 0.035 | 0.006    | 15.15           |
| 2.159      | 0.533      | 0.458                | 0.383                | 1.715 | 1.85     | 0.326 | 0.077    | 8.1             |
| 1.59       | 0          | 0.509                | 0.21                 | 1.826 | 1.921    | 0.429 | 0.268    | 0               |
| 1.466      | 1.011      | 2.227                | 0.367                | 3.508 | 5.417    | 0.164 | 0.033    | 133.75          |
| 1.866      | 0.773      | 1.009                | 0.51                 | 1.779 | 2.419    | 0.603 | 0.062    | 21.6            |
| 1.764      | 0          | 0.548                | 0.298                | 1.795 | 1.923    | 0.236 | 0.129    | 0               |
| --         | --         | --                   | --                   | --    | --       | --    | --       | --              |
| --         | --         | --                   | --                   | --    | --       | --    | --       | --              |
| 2.456      | 0          | 0.253                | 0.157                | 1.511 | 1.578    | 0.676 | 0.539    | 0               |
| 1.879      | -0.33      | 0.142                | 0.085                | 1.185 | 1.292    | 0.849 | 0.772    | 0               |
| 2.014      | 0          | 0.315                | 0.244                | 1.708 | 1.826    | 0.586 | 0.335    | 2.4             |
| --         | --         | --                   | --                   | --    | --       | --    | --       | --              |
| --         | --         | --                   | --                   | --    | --       | --    | --       | --              |
| 2.134      | 0          | 0.145                | 0.113                | 1.556 | 1.665    | 0.728 | 0.65     | 0               |
| 2.433      | 0          | 0.258                | 0.137                | 1.448 | 1.53     | 0.761 | 0.705    | 0               |
| 2.217      | 0          | 0.493                | 0.286                | 1.704 | 1.865    | 0.332 | 0.177    | 0               |
| 1.242      | 0          | 0.294                | 0.134                | 1.284 | 1.385    | 0.852 | 0.689    | 0               |
| 1.393      | 0          | 0.175                | 0.092                | 1.242 | 1.3      | 0.834 | 0.76     | 0               |
| --         | --         | --                   | --                   | --    | --       | --    | --       | --              |
| 1.207      | 0.825      | 0.027                | 0.026                | 1.027 | 1.048    | 0.975 | 0.956    | 0               |
| 1.406      | 0          | 0.496                | 0.17                 | 1.475 | 1.725    | 0.772 | 0.653    | 0               |
| 1.136      | 0          | 4.794                | 6.363                | 5.796 | 8.034    | 0.563 | 0.272    | 129.65          |
| 1.825      | 0          | 0.193                | 0.151                | 1.486 | 1.679    | 0.721 | 0.616    | 0               |
| 1.775      | 0.187      | 0.598                | 0.358                | 1.942 | 2.331    | 0.549 | 0.317    | 0               |
| 1.503      | 0          | 2.727                | 0.761                | 4.145 | 7.001    | 0.03  | 0.03     | 121.3           |
| 1.881      | 0          | 0.461                | 0.154                | 1.455 | 1.677    | 0.752 | 0.669    | 0               |
| 1.816      | 0          | 0.565                | 0.239                | 1.759 | 2.082    | 0.637 | 0.548    | 0               |
| 1.614      | 0          | 0.38                 | 0.178                | 1.557 | 1.665    | 0.588 | 0.511    | 0               |
| 1.956      | 0          | 0.452                | 0.292                | 1.688 | 1.802    | 0.585 | 0.359    | 0               |
| 1.753      | 0          | 0.409                | 0.203                | 1.598 | 1.693    | 0.452 | 0.264    | 0               |
| 1.087      | 0          | 1.639                | 0.615                | 2.927 | 3.745    | 0.351 | 0.057    | 44.75           |

|       |        |       |       |       |        |       |        |       |
|-------|--------|-------|-------|-------|--------|-------|--------|-------|
| --    | --     | --    | --    | --    | --     | --    | --     | --    |
| 1.503 | -0.382 | 0.464 | 0.18  | 1.615 | 1.801  | 0.736 | 0.453  | 0     |
| 2.302 | 0      | 0.319 | 0.221 | 1.741 | 1.939  | 0.514 | 0.259  | 0     |
| 1.867 | 0      | 0.361 | 0.23  | 1.629 | 1.735  | 0.423 | 0.375  | 0     |
| --    | --     | --    | --    | --    | --     | --    | --     | --    |
| 1.587 | 0.219  | 0.393 | 0.196 | 1.579 | 1.694  | 0.501 | 0.286  | 0     |
| 1.734 | -0.603 | 0.248 | 0.121 | 1.372 | 1.483  | 0.731 | 0.652  | 0     |
| 1.074 | 0      | 0.122 | 0.045 | 1.107 | 1.144  | 0.951 | 0.898  | 0     |
| 1.96  | 0      | 0.971 | 0.671 | 2.583 | 3.126  | 0.279 | 0.024  | 15.55 |
| 2.257 | 0      | 0.332 | 0.184 | 1.54  | 1.807  | 0.677 | 0.416  | 0     |
| --    | --     | --    | --    | --    | --     | --    | --     | --    |
| 1.292 | 0      | 2.68  | 0     | 3.772 | 5.573  | 0.093 | 0.022  | 27.2  |
| 1.344 | 0      | 1.542 | 0.416 | 2.759 | 3.456  | 0.078 | -0.024 | 10.25 |
| 1.518 | 0      | 0.393 | 0.124 | 1.337 | 1.571  | 0.878 | 0.777  | 0     |
| --    | --     | --    | --    | --    | --     | --    | --     | --    |
| 1.505 | 0      | 0.708 | 0.398 | 2.38  | 3.1    | 0.463 | 0.137  | 0     |
| 1.494 | 0      | 0.282 | 0.144 | 1.27  | 1.72   | 0.772 | 0.59   | 0     |
| 1.601 | 0      | 0.291 | 0.187 | 1.565 | 1.648  | 0.558 | 0.424  | 0     |
| --    | --     | --    | --    | --    | --     | --    | --     | --    |
| 1.555 | 0      | 0.279 | 0.139 | 1.448 | 1.57   | 0.734 | 0.665  | 0     |
| 1.63  | 0      | 0.137 | 0.066 | 1.208 | 1.276  | 0.878 | 0.849  | 0     |
| 1.247 | -1.027 | 0.31  | 0.082 | 1.297 | 1.456  | 0.888 | 0.795  | 0     |
| 1.58  | 0      | 0.332 | 0.221 | 1.451 | 1.519  | 0.453 | 0.235  | 0     |
| 1.985 | 0      | 0.114 | 0.102 | 1.482 | 1.551  | 0.763 | 0.728  | 0     |
| 2.226 | 0      | 0.242 | 0.216 | 2.003 | 2.108  | 0.538 | 0.332  | 0     |
| 1.557 | 0      | 0.209 | 0.116 | 1.37  | 1.454  | 0.668 | 0.585  | 0     |
| 3.016 | 0      | 0.1   | 0.053 | 1.228 | 1.276  | 0.802 | 0.742  | 0     |
| 2.006 | 0      | 0.185 | 0.135 | 1.491 | 1.555  | 0.589 | 0.333  | 0     |
| 2.441 | 0      | 0.059 | 0.039 | 1.147 | 1.18   | 0.894 | 0.859  | 0     |
| 2.026 | 0      | 0.759 | 0.861 | 3.048 | 3.223  | 0.664 | 0.163  | 168.4 |
| 1.796 | 0      | 1.205 | 0.389 | 2.548 | 3.429  | 0.273 | 0.016  | 0     |
| 1.3   | 0      | 0.853 | 0.425 | 2.101 | 2.502  | 0.403 | 0.225  | 0     |
| 2.687 | 0      | 0.074 | 0.054 | 1.147 | 1.174  | 0.929 | 0.818  | 0     |
| 1.764 | 0      | 0.572 | 0.311 | 1.998 | 2.182  | 0.314 | 0.245  | 0     |
| 1.895 | 0.788  | 0.745 | 0.377 | 2.406 | 2.782  | 0.255 | 0.175  | 0     |
| 1.799 | 0      | 0.132 | 0.09  | 1.282 | 1.418  | 0.77  | 0.68   | 0     |
| 2.29  | 0      | 0.07  | 0.065 | 1.186 | 1.263  | 0.91  | 0.856  | 0     |
| 2.158 | 0.789  | 0.017 | 0.06  | 1.024 | 1.055  | 0.986 | 0.943  | 0     |
| 1.092 | 0      | 0.961 | 0.421 | 2.109 | 2.492  | 0.19  | 0.078  | 0     |
| 1.96  | 0.572  | 0.079 | 0.08  | 1.177 | 1.245  | 0.904 | 0.817  | 0     |
| 1.302 | 0      | 0.242 | 0.113 | 1.325 | 1.384  | 0.811 | 0.71   | 0     |
| --    | --     | --    | --    | --    | --     | --    | --     | --    |
| 2.167 | 0      | 1.187 | 0.715 | 2.816 | 3.584  | 0.426 | -0.03  | 1.65  |
| 1.906 | 0      | 0.088 | 0.116 | 1.214 | 1.336  | 0.828 | 0.703  | 0     |
| 1.52  | 1.181  | 0.071 | 0.064 | 1.19  | 1.233  | 0.916 | 0.82   | 0     |
| 1.442 | -0.599 | 0.496 | 0.277 | 1.706 | 1.832  | 0.286 | 0.073  | 0     |
| 1.863 | 0      | 0.349 | 0.168 | 1.533 | 1.719  | 0.676 | 0.295  | 0     |
| 1.454 | 0      | 0.748 | 0.337 | 2.22  | 2.417  | 0.548 | 0.159  | 0     |
| 1.725 | 0.915  | 0.34  | 0.235 | 1.581 | 1.729  | 0.529 | 0.2    | 0     |
| 1.405 | 0.437  | 0.074 | 0.069 | 1.147 | 1.194  | 0.903 | 0.852  | 0     |
| 1.658 | -0.594 | 6.4   | 0     | 7.343 | 11.279 | 0     | 0      | 277.6 |
| 2.12  | 0.764  | 0.294 | 0.153 | 1.442 | 1.582  | 0.76  | 0.653  | 0     |

| --    | --    | --    | --    | --    | --    | --    | --    | -- |
|-------|-------|-------|-------|-------|-------|-------|-------|----|
| 1.887 | 1.076 | 0.023 | 0.027 | 1.092 | 1.137 | 0.933 | 0.903 | 0  |
| 2.56  | 0     | 0.031 | 0.025 | 1.111 | 1.14  | 0.912 | 0.881 | 0  |

| $\sigma_{ZF}$ | $Zf_{max}$ | $ZF_{min}$ |
|---------------|------------|------------|
| 0             | 0          | 0          |
| 0.22          | 1          | 0          |
| --            | --         | --         |
| 0             | 0          | 0          |
| 0             | 0          | 0          |
| 66.62         | 269        | 0          |
| 0             | 0          | 0          |
| --            | --         | --         |
| 0             | 0          | 0          |
| 52.38         | 161        | 0          |
| 0             | 0          | 0          |
| 0             | 0          | 0          |
| 0             | 0          | 0          |
| 0             | 0          | 0          |
| 0             | 0          | 0          |
| 0             | 0          | 0          |
| 0             | 0          | 0          |
| 0             | 0          | 0          |
| 0             | 0          | 0          |
| 0             | 0          | 0          |
| 22.83         | 72         | 0          |
| 29.55         | 133        | 0          |
| 0             | 0          | 0          |
| 110.4         | 364        | 0          |
| 48.16         | 168        | 0          |
| 0             | 0          | 0          |
| --            | --         | --         |
| --            | --         | --         |
| 0             | 0          | 0          |
| 0             | 0          | 0          |
| 10.73         | 48         | 0          |
| --            | --         | --         |
| --            | --         | --         |
| 0             | 0          | 0          |
| 0             | 0          | 0          |
| 0             | 0          | 0          |
| 0             | 0          | 0          |
| 0             | 0          | 0          |
| --            | --         | --         |
| 0             | 0          | 0          |
| 0             | 0          | 0          |
| 78.49         | 282        | 0          |
| 0             | 0          | 0          |
| 0             | 0          | 0          |
| 67.64         | 232        | 6          |
| 0             | 0          | 0          |
| 0             | 0          | 0          |
| 0             | 0          | 0          |
| 0             | 0          | 0          |
| 0             | 0          | 0          |
| 56.93         | 172        | 0          |

|       |     |     |
|-------|-----|-----|
| --    | --  | --  |
| 0     | 0   | 0   |
| 0     | 0   | 0   |
| 0     | 0   | 0   |
| --    | --  | --  |
| 0     | 0   | 0   |
| 0     | 0   | 0   |
| 0     | 0   | 0   |
| 22.25 | 61  | 0   |
| 0     | 0   | 0   |
| --    | --  | --  |
| 35.25 | 107 | 0   |
| 17.08 | 50  | 0   |
| 0     | 0   | 0   |
| --    | --  | --  |
| 0     | 0   | 0   |
| 0     | 0   | 0   |
| 0     | 0   | 0   |
| --    | --  | --  |
| 0     | 0   | 0   |
| 0     | 0   | 0   |
| 0     | 0   | 0   |
| 0     | 0   | 0   |
| 0     | 0   | 0   |
| 0     | 0   | 0   |
| 0     | 0   | 0   |
| 0     | 0   | 0   |
| 0     | 0   | 0   |
| 0     | 0   | 0   |
| 0     | 0   | 0   |
| 21.58 | 208 | 137 |
| 0     | 0   | 0   |
| 0     | 0   | 0   |
| 0     | 0   | 0   |
| 0     | 0   | 0   |
| 0     | 0   | 0   |
| 0     | 0   | 0   |
| 0     | 0   | 0   |
| 0     | 0   | 0   |
| 0     | 0   | 0   |
| 0     | 0   | 0   |
| 0     | 0   | 0   |
| --    | --  | --  |
| 7.38  | 33  | 0   |
| 0     | 0   | 0   |
| 0     | 0   | 0   |
| 0     | 0   | 0   |
| 0     | 0   | 0   |
| 0     | 0   | 0   |
| 0     | 0   | 0   |
| 0     | 0   | 0   |
| 68.23 | 356 | 112 |
| 0     | 0   | 0   |

--

0

0

--

0

0

--

0

0
